# Supplementary material for: Low-content SnO2 nanodots on N-doped graphene: lattice-confinement preparation and high-performance lithium/sodium storage
Source: Royal Society of Chemistry journal article supplement (doi:10.1039/d2dt03616a), 2022-12-24
Supplement: d2dt03616a1.pdf [file d2dt03616a1.pdf]

## Electronic Supplementary Information

### Low-content SnO<sub>2</sub> nanodots on N-doped graphene: lattice-confinement preparation and high-performance lithium/sodium storage

Shuaipeng Liu,<sup>a</sup> Yan Dong,<sup>a</sup> Chengwei Deng,<sup>a</sup> Feijiang Chen,<sup>a</sup> Yu Su,<sup>a</sup> Sheng-Yi Li<sup>b,\*</sup> and Sailong Xu<sup>a,\*</sup>

<sup>a</sup> State Key Laboratory of Chemical Resource Engineering, Beijing University of Chemical Technology, Beijing 100029, China. E-mail: xusl@buct.edu.cn

<sup>b</sup> Beijing Institute of Smart Energy, Beijing 102209, China. E-mail: lishengyi@geiri.sgcc.cn

Figure S1

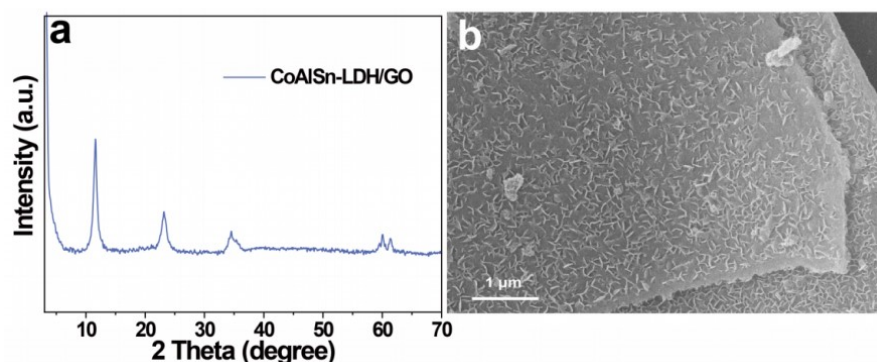

**Figure S1.** (a) XRD spectrum of CoAlSn-LDH/GO precursor, (b) SEM image of CoAlSn-LDH/GO precursor.

**Figure S2**

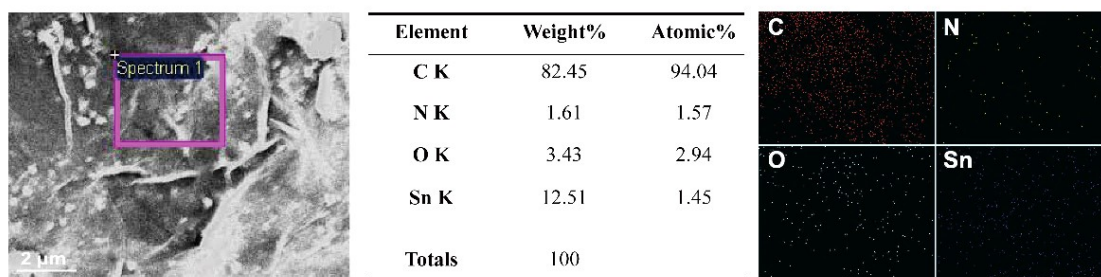

**Figure S2.** The SEM/EDS element mapping of SnO<sub>2</sub>@N-rGO.

**Figure S3**

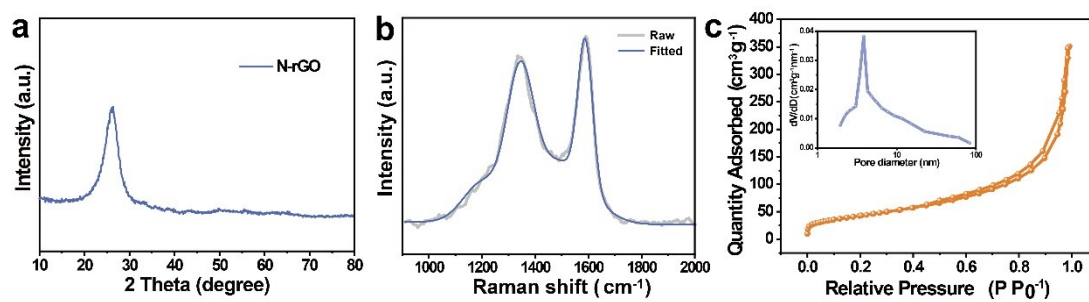

**Figure S3.** The N-rGO counterpart prepared for comparison: (a) XRD pattern, and (b) Raman spectrum, and (c) N<sub>2</sub> adsorption/desorption isotherm curve (Insert shows a mesoporous size distribution).

Figure S4

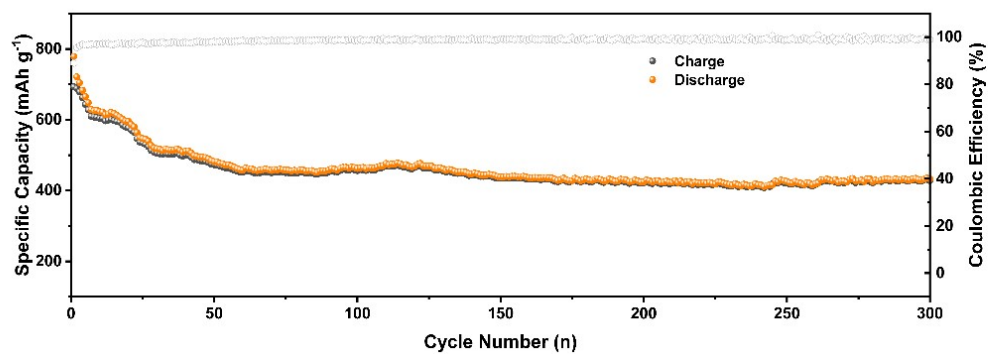

Figure S4. Long-cycling performance of SnO<sub>2</sub>@N-rGO at 2000 mA g<sup>-1</sup> for LIBs.

Figure S5

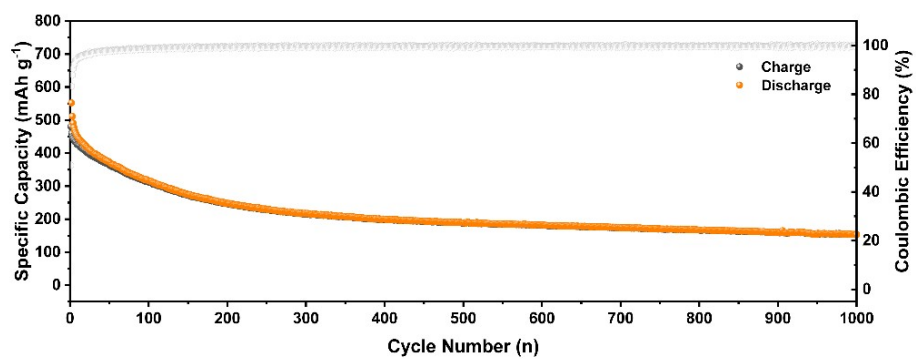

Figure S5. Long-cycling performance of SnO<sub>2</sub>@N-rGO at 2000 mA g<sup>-1</sup> for SIBs.

Figure S6

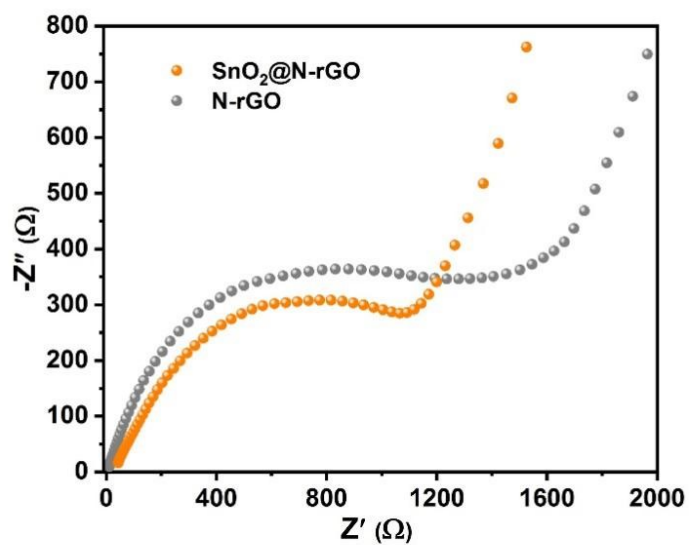

**Figure S6.** Comparison of EIS between the SnO<sub>2</sub>@N-rGO composite and the N-rGO counterpart for SIBs.

**Figure S7**

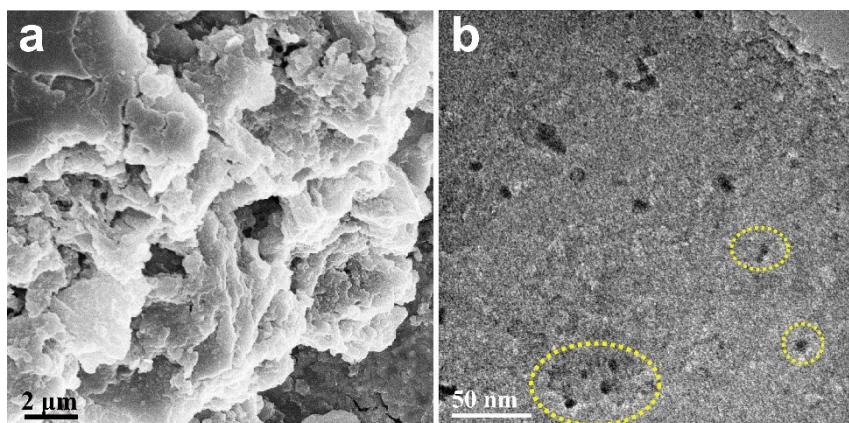

**Figure S7.** (a) SEM and (b) TEM image of the post-cycled  $\text{SnO}_2@\text{N-rGO}$  electrode after 100 cycles at  $0.1 \text{ A g}^{-1}$  for SIBs, without significant aggregation or volume expansion, as marked by the dotted line circles.

**Table S1.**

Comparison of cycling performance between SnO<sub>2</sub>@N-rGO and the reported SnO<sub>2</sub>-based anode nanomaterials for LIBs.

| SnO <sub>2</sub> -based materials                                   | Current density /mA g <sup>-1</sup> | Specific capacity /mAh g <sup>-1</sup> | Cycles | References       |
|---------------------------------------------------------------------|-------------------------------------|----------------------------------------|--------|------------------|
| SnO <sub>2</sub> /carbon@-void@carbon (SnO <sub>2</sub> : 45.3 wt%) | 500                                 | 866                                    | 200    | 1                |
| SnO <sub>2</sub> NPs                                                | 1000                                | 887                                    | 1000   | 2                |
| SnO <sub>2</sub> /graphene (SnO <sub>2</sub> : 54 wt%)              | 100                                 | 1420                                   | 90     | 3                |
| SnO <sub>2</sub> /GNP (SnO <sub>2</sub> : 80 wt%)                   | 100                                 | 745                                    | 100    | 4                |
| SnO <sub>2</sub> /MXenes                                            | 100                                 | 904.1                                  | 1000   | 5                |
| NC@SnO <sub>2</sub> (SnO <sub>2</sub> : 67.81wt%)                   | 1000                                | 750                                    | 100    | 6                |
| SnO <sub>2</sub> @P@GO (SnO <sub>2</sub> : 82.18 wt%)               | 100                                 | 550                                    | 200    | 7                |
| SnO <sub>2</sub> @C (SnO <sub>2</sub> : 91.77 wt%)                  | 50                                  | 725                                    | 200    | 8                |
| SnO <sub>2</sub> @CNFs (SnO <sub>2</sub> : 18.1 wt%)                | 50                                  | 380.4                                  | 100    | 9                |
| SnO <sub>2</sub> @N-rGO (SnO <sub>2</sub> : 17.9 wt%)               | 100                                 | 1146.2                                 | 100    | <b>This work</b> |
|                                                                     | 2000                                | 428.5                                  | 300    |                  |



**Table S2.**

Comparison of cycling performance between SnO<sub>2</sub>@N-rGO and the reported SnO<sub>2</sub>-based anode nanomaterials for SIBs.

| SnO <sub>2</sub> -based materials                            | Current density /mA g <sup>-1</sup> | Specific capacity /mAh g <sup>-1</sup> | Cycles      | References       |
|--------------------------------------------------------------|-------------------------------------|----------------------------------------|-------------|------------------|
| NBT/C@SnO <sub>2</sub> NFs                                   | 200                                 | 420.7                                  | 500         | 10               |
| SnO <sub>2</sub> -NG (SnO <sub>2</sub> : 50 wt%)             | 50                                  | 409.6                                  | 100         | 11               |
| SnO <sub>2</sub> @NC (SnO <sub>2</sub> : 55.5 wt%)           | 1000                                | 212.6                                  | 3000        | 12               |
| SnO <sub>2</sub> /rGO (SnO <sub>2</sub> : 90.71 wt%)         | 200                                 | 204                                    | 1500        | 13               |
| SnO <sub>2</sub> /CNT (SnO <sub>2</sub> : 72 wt%)            | 100                                 | 630.4                                  | 100         | 14               |
| SnO <sub>2-x</sub> /C nanofibers (SnO <sub>2</sub> : 54 wt%) | 1000                                | 565                                    | 2000        | 15               |
| N-C@SnO <sub>2</sub> (SnO <sub>2</sub> : 67.81 wt%)          | 100                                 | 270                                    | 100         | 6                |
| SnO <sub>2</sub> /graphene (SnO <sub>2</sub> : 54 wt%)       | 200                                 | 650                                    | 90          | 3                |
| PCNF@SnO <sub>2</sub> @C (SnO <sub>2</sub> : 38.5 wt%)       | 50                                  | 374                                    | 100         | 16               |
| SnO <sub>2</sub> -PC (SnO <sub>2</sub> : 74.47 wt%)          | 100                                 | 280.1                                  | 250         | 17               |
| SnO <sub>2</sub> @NC-rGO (SnO <sub>2</sub> : 17.9 wt%)       | 100<br>2000                         | 387<br>150                             | 100<br>1000 | <b>This work</b> |

## References

1. Y. Li, K. Lin, X. Qin, K. Zeng, Y. Liu, Y. Xia, F. Lv, H. Zhu, F. Kang and B. Li, *Carbon*, 2021, **183**, 486-494.
2. Y. Wang, N. Jiang, D. Pan, H. Jiang, Y. Hu and C. Li, *Chem. Eng. J.*, 2022, **437**, 135422.
3. W. Chen, K. Song, L. Mi, X. Feng, J. Zhang, S. Cui and C. Liu, *J. Mater. Chem. A*, 2017, **5**, 10027-10038.
4. M. Palanisamy, C. Jamison, X. Sun, Z. Qi, H. Wang and V. G. Pol, *Carbon*, 2021, **185**, 608-618.
5. C. Zhao, Z. Wei, J. Zhang, P. He, X. Huang, X. Duan, D. Jia and Y. Zhou, *J. Alloys Compds.*, 2022, **907**, 164428.
6. J. Liang, C. Yuan, H. Li, K. Fan, Z. Wei, H. Sun and J. Ma, *Nano-Micro Lett.*, 2017,

- 10**, 21.
7. L. Zhang, K. Zhao, R. Yu, M. Yan, W. Xu, Y. Dong, W. Ren, X. Xu, C. Tang and L. Mai, *Small*, 2017, **13**, 1603973.
  8. A. A. Ambalkar, R. P. Panmand, U. V. Kawade, Y. A. Sethi, S. D. Naik, M. V. Kulkarni, P. V. Adhyapak and B. B. Kale, *New J. Chem.*, 2020, **44**, 3366-3374.
  9. Z. Huang, H. Gao, Q. Wang, Y. Zhao and G. Li, *Mate. Lett.*, 2017, **186**, 231-234.
  10. L. Wang, C. Lin, G. Yang, N. Wang and W. Yan, *Electrochim. Acta*, 2022, **411**, 140049.
  11. L. Fan, X. Song, D. Xiong and X. Li, *J. Electroanal. Chem.*, 2019, **833**, 340-348.
  12. Y. Cheng, S. Wang, L. Zhou, L. Chang, W. Liu, D. Yin, Z. Yi and L. Wang, *Small*, 2020, **16**, 2000681.
  13. Z. Kong, X. Liu, T. Wang, A. Fu, Y. Li, P. Guo, Y.-G. Guo, H. Li and X. S. Zhao, *Appl. Surface Sci.*, 2019, **479**, 198-208.
  14. J. Cui, Z.-L. Xu, S. Yao, J. Huang, J.-Q. Huang, S. Abouali, M. A. Garakani, X. Ning and J.-K. Kim, *J. Mater. Chem. A*, 2016, **4**, 10964-10973.
  15. D. Ma, Y. Li, H. Mi, S. Luo, P. Zhang, Z. Lin, J. Li and H. Zhang, *Angew. Chem. Int. Ed.*, 2018, **57**, 8901-8905.
  16. M. Dirican, Y. Lu, Y. Ge, O. Yildiz and X. Zhang, *ACS Appl. Mater. Interfaces*, 2015, **7**, 18387-18396.
  17. Z. Huang, H. Hou, G. Zou, J. Chen, Y. Zhang, H. Liao, S. Li and X. Ji, *Electrochim. Acta*, 2016, **214**, 156-164.
